# Supplementary material for: CILAIR-Based Secretome Analysis of Obese Visceral and Subcutaneous Adipose Tissues Reveals Distinctive ECM Remodeling and Inflammation Mediators
Source: PubMed Central journal article supplement (PMC4648467; doi:10.1038/srep12214), 2015-07-22
Supplement: srep12214-s1.pdf [file srep12214-s1.pdf]

## **SUPPLEMENTARY MATERIAL**

### **CILAIR-BASED SECRETOME ANALYSIS OF OBESE VISCERAL AND SUBCUTANEOUS ADIPOSE TISSUES REVEALS DISTINCTIVE ECM REMODELING AND INFLAMMATION MEDIATORS.**

Arturo Roca-Rivada, Susana Belen Bravo, Diego Perez-Sotelo, Jana Alonso, Ana Isabel Castro, Ivan Baamonde, Javier Baltar, Felipe F Casanueva, Maria Pardo.

**SUPPLEMENTARY TABLE 1**

|            | <b>PROTEIN ID</b>  | <b>PROTEIN NAME</b>                                              | <b>Secretome P</b> | <b>Sequence coverage % Cov (95)</b> |
|------------|--------------------|------------------------------------------------------------------|--------------------|-------------------------------------|
| <b>VAT</b> | P31946 1433B_HUMAN | 14-3-3 protein beta/alpha                                        | 0,352              | 15,5                                |
|            | P63261 ACTG_HUMAN  | Actin, cytoplasmic 2                                             | 0,505              | 21,1                                |
|            | Q15848 ADIPO_HUMAN | Adiponectin                                                      | SP                 | 6,1                                 |
|            | P01023 A2MG_HUMAN  | Alpha-2-macroglobulin                                            | SP                 | 4,2                                 |
|            | P05067 A4_HUMAN    | Amyloid beta A4 protein                                          | SP                 | 1,3                                 |
|            | P07355 ANXA2_HUMAN | Annexin A2                                                       | 0,746              | 8,9                                 |
|            | P02647 APOA1_HUMAN | Apolipoprotein A-I                                               | SP                 | 19,1                                |
|            | P02649 APOE_HUMAN  | Apolipoprotein E                                                 | SP                 | 1                                   |
|            | P20160 CAP7_HUMAN  | Azurocidin                                                       | SP                 | 5,2                                 |
|            | Q8NE79 POPD1_HUMAN | Blood vessel epicardial substance O                              | 0,565              | 1                                   |
|            | P27797 CALR_HUMAN  | Calreticulin                                                     | SP                 | 11,3                                |
|            | O94985 CSTN1_HUMAN | Calsyntenin-1                                                    | SP                 | 2,4                                 |
|            | P00915 CAH1_HUMAN  | Carbonic anhydrase 1                                             | 0,62               | 18,0                                |
|            | P16870 CBPE_HUMAN  | Carboxypeptidase E                                               | SP                 | 1,0                                 |
|            | Q9UBR2 CATZ_HUMAN  | Cathepsin Z                                                      | SP                 | 3,3                                 |
|            | Q03135 CAV1_HUMAN  | Caveolin-1                                                       | 0,5                | 11,8                                |
|            | Q6YHK3 CD109_HUMAN | CD109 antigen                                                    | SP                 | 1,3                                 |
|            | P16070 CD44_HUMAN  | CD44 antigen                                                     | SP                 | 1,6                                 |
|            | P43121 MUC18_HUMAN | Cell surface glycoprotein MUC18                                  | SP                 | 4,5                                 |
|            | Q9P2E5 CHPF2_HUMAN | Chondroitin sulfate glucuronyltransferase                        | SP                 | 1,0                                 |
|            | P10909 CLUS_HUMAN  | Clusterin                                                        | SP                 | 2,7                                 |
|            | P02452 CO1A1_HUMAN | Collagen alpha-1(I) chain                                        | SP                 | 24,9                                |
|            | P02461 CO3A1_HUMAN | Collagen alpha-1(III) chain                                      | SP                 | 16,3                                |
|            | P02462 CO4A1_HUMAN | Collagen alpha-1(IV) chain                                       | SP                 | 8,6                                 |
|            | P20908 CO5A1_HUMAN | Collagen alpha-1(V) chain                                        | SP                 | 2,2                                 |
|            | Q05707 COEA1_HUMAN | Collagen alpha-1(XIV) chain                                      | SP                 | 4,7                                 |
|            | P05997 CO5A2_HUMAN | Collagen alpha-2(V) chain                                        | SP                 | 1,0                                 |
|            | P0C0L5 CO4B_HUMAN  | Complement C4-B                                                  | SP                 | 1,0                                 |
|            | P10643 CO7_HUMAN   | Complement component C7                                          | SP                 | 1,0                                 |
|            | P00746 CFAD_HUMAN  | Complement factor D (Adipsin)                                    | SP                 | 5,1                                 |
|            | P08603 CFAH_HUMAN  | Complement factor H                                              | SP                 | 1,5                                 |
|            | P07585 PGS2_HUMAN  | Decorin                                                          | 0,506              | 10,3                                |
|            | Q07507 DERM_HUMAN  | Dermatopontin                                                    | SP                 | 4,0                                 |
|            | P53634 CATC_HUMAN  | Dipeptidyl peptidase 1                                           | SP                 | 2,4                                 |
|            | O43184 ADA12_HUMAN | Disintegrin and metalloproteinase domain-containing protein 12   | SP                 | 1,3                                 |
|            | Q13822 ENPP2_HUMAN | Ectonucleotide pyrophosphatase/phosphodiesterase family member 2 | SP                 | 1,6                                 |
|            | Q9Y6C2 EMIL1_HUMAN | EMILIN-1                                                         | SP                 | 2,3                                 |
|            | Q9NZ08 ERAP1_HUMAN | Endoplasmic reticulum aminopeptidase 1                           | SP                 | 2,8                                 |
|            | Q9HCU0 CD248_HUMAN | Endosialin                                                       | SP                 | 7,9                                 |

|                      |                                                                                                         |       |      |
|----------------------|---------------------------------------------------------------------------------------------------------|-------|------|
| P07099 HYEP_HUMAN    | Epoxide hydrolase 1                                                                                     | SP    | 4,0  |
| P08294 SODE_HUMAN    | Extracellular superoxide dismutase [Cu-Zn]                                                              | SP    | 6,7  |
| P15090 FABP4_HUMAN   | Fatty acid-binding protein, adipocyte                                                                   | 0,747 | 39,4 |
| P35555 FBN1_HUMAN    | Fibrillin-1                                                                                             | SP    | 0,7  |
| P02675 FIBB_HUMAN    | Fibrinogen beta chain                                                                                   | SP    | 30,6 |
| P02679 FIBG_HUMAN    | Fibrinogen gamma chain                                                                                  | SP    | 15,7 |
| Q06828 FMOD_HUMAN    | Fibromodulin                                                                                            | SP    | 4,5  |
| P98095 FBLN2_HUMAN   | Fibulin-2                                                                                               | SP    | 0,8  |
| Q9UBX5 FBLN5_HUMAN   | Fibulin-5                                                                                               | SP    | 5,6  |
| Q12841 FSTL1_HUMAN   | Follistatin-related protein 1                                                                           | SP    | 3,2  |
| P04792 HB1_HUMAN     | Heat shock protein beta-1                                                                               | 0,74  | 4,4  |
| P02790 HEMO_HUMAN    | Hemopexin                                                                                               | SP    | 2,4  |
| Q96QV6 H2A1A_HUMAN   | Histone H2A type 1-A                                                                                    | 0,516 | 6,9  |
| Q9BTM1 H2AJ_HUMAN    | Histone H2A.J                                                                                           | 0,559 | 12,4 |
| Q16695 H31T_HUMAN    | Histone H3.1t                                                                                           | 0,696 | 8,1  |
| Q29836 1B67_HUMAN    | HLA class I histocompatibility antigen, B-67 alpha chain                                                | SP    | 3,6  |
| P01876 IGHA1_HUMAN   | Ig alpha-1 chain C region                                                                               | 0,732 | 7,1  |
| P01857 IGHG1_HUMAN   | Ig gamma-1 chain C region                                                                               | 0,581 | 11,8 |
| P01859 IGHG2_HUMAN   | Ig gamma-2 chain C region                                                                               | 0,638 | 11,4 |
| P01767 HV306_HUMAN   | Ig heavy chain V-III region BUT                                                                         | 0,705 | 9,6  |
| P01772 HV311_HUMAN   | Ig heavy chain V-III region KOL                                                                         | 0,909 | 12,7 |
| P01834 IGKC_HUMAN    | Ig kappa chain C region                                                                                 | 0,659 | 48,1 |
| P01703 LV105_HUMAN   | Ig lambda chain V-I region NEWM                                                                         | 0,839 | 16,5 |
| P0CG06 LAC3_HUMAN    | Ig lambda-3 chain C regions                                                                             | 0,783 | 28,3 |
| P01871 IGHM_HUMAN    | Ig mu chain C region                                                                                    | 0,566 | 5,8  |
| P04220 MUCB_HUMAN    | Ig mu heavy chain disease protein                                                                       | 0,509 | 4,9  |
| O14498 ISLR_HUMAN    | Immunoglobulin superfamily containing leucine-rich repeat protein                                       | SP    | 1,9  |
| P22692 IBP4_HUMAN    | Insulin-like growth factor-binding protein 4                                                            | SP    | 7,8  |
| Q16270 IBP7_HUMAN    | Insulin-like growth factor-binding protein 7                                                            | SP    | 7,8  |
| P05231 IL6_HUMAN     | Interleukin-6                                                                                           | SP    | 8,0  |
| P10145 IL8_HUMAN     | Interleukin-8                                                                                           | SP    | 16,2 |
| O75874 IDHC_HUMAN    | Isocitrate dehydrogenase [NADP] cytoplasmic                                                             | 0,547 | 1,0  |
| Q76M96-2 CCD80_HUMAN | Isoform 2 of Coiled-coil domain-containing protein 80                                                   | SP    | 4,2  |
| P23142-4 FBLN1_HUMAN | Isoform C of Fibulin-1                                                                                  | SP    | 2,9  |
| P02751-9 FINC_HUMAN  | Isoform Fibronectin not containing EIIIA and EIIIB and uses V64 variant of IIIICS region of Fibronectin | SP    | 9,0  |
| P13611-5 CG2_HUMAN   | Isoform Vint of Versican core protein                                                                   | SP    | 3,4  |
| P02788 TRFL_HUMAN    | Lactotransferrin                                                                                        | SP    | 1,7  |
| O15230 LAMA5_HUMAN   | Laminin subunit alpha-5                                                                                 | SP    | 0,4  |
| P07942 LAMB1_HUMAN   | Laminin subunit beta-1                                                                                  | SP    | 1,1  |
| P55268 LAMB2_HUMAN   | Laminin subunit beta-2                                                                                  | SP    | 1,1  |

|                    |                                                    |       |      |
|--------------------|----------------------------------------------------|-------|------|
| Q99538 LGMN_HUMAN  | Legumain                                           | SP    | 3,9  |
| P41159 LEP_HUMAN   | Leptin                                             | SP    | 10,8 |
| P15018 LIF_HUMAN   | Leukemia inhibitory factor                         | SP    | 8,4  |
| P30740 ILEU_HUMAN  | Leukocyte elastase inhibitor                       | 0,516 | 3,7  |
| P18428 LBP_HUMAN   | Lipopolysaccharide-binding protein                 | SP    | 2,3  |
| P23141 EST1_HUMAN  | Liver carboxylesterase 1                           | SP    | 27,0 |
| P00338 LDHA_HUMAN  | L-lactate dehydrogenase A chain                    | 0,549 | 9,3  |
| P07195 LDHB_HUMAN  | L-lactate dehydrogenase B chain                    | 0,569 | 6,3  |
| P51884 LUM_HUMAN   | Lumican                                            | SP    | 44,1 |
| P09603 CSF1_HUMAN  | Macrophage colony-stimulating factor 1             | SP    | 3,2  |
| Q5VSK2 MRC1L_HUMAN | Macrophage mannose receptor 1-like protein 1       | SP    | 0,8  |
| P33908 MA1A1_HUMAN | Mannosyl-oligosaccharide 1,2-alpha-mannosidase IA  | SP    | 2,1  |
| P14780 MMP9_HUMAN  | Matrix metalloproteinase-9                         | SP    | 2,1  |
| Q16853 AOC3_HUMAN  | Membrane primary amine oxidase                     | SP    | 5,9  |
| P55083 MFAP4_HUMAN | Microfibril-associated glycoprotein 4              | SP    | 1,0  |
| P05164 PERM_HUMAN  | Myeloperoxidase                                    | SP    | 2,4  |
| P80188 NGAL_HUMAN  | Neutrophil gelatinase-associated lipocalin         | SP    | 7,6  |
| P14543 NID1_HUMAN  | Nidogen-1                                          | SP    | 6,7  |
| P26022 PTX3_HUMAN  | Pentraxin-related protein PTX3                     | SP    | 1,5  |
| P19021 AMD_HUMAN   | Peptidyl-glycine alpha-amidating monooxygenase     | SP    | 1,5  |
| Q06830 PRDX1_HUMAN | Peroxiredoxin-1                                    | 0,528 | 5,0  |
| P32119 PRDX2_HUMAN | Peroxiredoxin-2                                    | 0,522 | 9,1  |
| P30086 PEBP1_HUMAN | Phosphatidylethanolamine-binding protein 1         | 0,672 | 17,7 |
| P55058 PLTP_HUMAN  | Phospholipid transfer protein                      | SP    | 3,0  |
| P05155 IC1_HUMAN   | Plasma protease C1 inhibitor                       | SP    | 5,4  |
| P05120 PAI2_HUMAN  | Plasminogen activator inhibitor 2                  | 0,536 | 13,4 |
| P13796 PLSL_HUMAN  | Plastin-2                                          | 0,502 | 2,6  |
| P07602 SAP_HUMAN   | Proactivator polypeptide                           | SP    | 2,5  |
| Q96SM3 CPXM1_HUMAN | Probable carboxypeptidase X1                       | SP    | 2,0  |
| Q15084 PDIA6_HUMAN | Protein disulfide-isomerase A6                     | SP    | 3,9  |
| Q6DN03 H2B2C_HUMAN | Putative histone H2B type 2-C                      | 0,575 | 5,2  |
| P49788 TIG1_HUMAN  | Retinoic acid receptor responder protein 1         | SP    | 6,1  |
| P02753 RET4_HUMAN  | Retinol-binding protein 4                          | SP    | 5,0  |
| P07998 RNAS1_HUMAN | Ribonuclease pancreatic                            | SP    | 4,5  |
| O75326 SEM7A_HUMAN | Semaphorin-7A                                      | SP    | 2,3  |
| P02787 TRFE_HUMAN  | Serotransferrin                                    | SP    | 6,4  |
| P02768 ALBU_HUMAN  | Serum albumin                                      | SP    | 50,6 |
| P02743 SAMP_HUMAN  | Serum amyloid P-component                          | SP    | 4,5  |
| O75368 SH3L1_HUMAN | SH3 domain-binding glutamic acid-rich-like protein | 0,758 | 8,8  |
| A6NMB1 SIG16_HUMAN | Sialic acid-binding Ig-like lectin 16              | SP    | 1,0  |
| Q13621 S12A1_HUMAN | Solute carrier family 12 member 1                  | 0,565 | 1,0  |

|                    |                                          |       |      |
|--------------------|------------------------------------------|-------|------|
| Q9BUD6 ON2_HUMAN   | Spondin-2                                | SP    | 3,6  |
| P09238 MMP10_HUMAN | Stromelysin-2                            | SP    | 2,5  |
| P04179 SODM_HUMAN  | Superoxide dismutase [Mn], mitochondrial | 0,535 | 6,3  |
| P22105 TENX_HUMAN  | Tenascin-X                               | SP    | 1,0  |
| Q9UKZ4 TEN1_HUMAN  | Teneurin-1                               | 0,591 | 1,0  |
| Q8NBS9 TXND5_HUMAN | Thioredoxin domain-containing protein 5  | SP    | 4,2  |
| P10646 TFPI1_HUMAN | Tissue factor pathway inhibitor          | SP    | 2,6  |
| P48307 TFPI2_HUMAN | Tissue factor pathway inhibitor 2        | SP    | 14,9 |
| P60174 TPIS_HUMAN  | Triosephosphate isomerase                | 0,51  | 22,5 |
| Q15661 TRYB1_HUMAN | Tryptase beta-1                          | SP    | 1,0  |
| P62988 UBIQ_HUMAN  | Ubiquitin                                |       | 17,1 |
| Q969H8 CS010_HUMAN | UPF0556 protein C19orf10                 | SP    | 5,2  |
| P00749 UROK_HUMAN  | Urokinase-type plasminogen activator     | SP    | 2,1  |
| P08670 VIME_HUMAN  | Vimentin                                 | 0,512 | 13,3 |
| P07225 PROS_HUMAN  | Vitamin K-dependent protein S            | SP    | 1,2  |
| P04004 VTNC_HUMAN  | Vitronectin                              | SP    | 3,1  |

|            | PROTEIN ID           | PROTEIN NAME                                                                      | Secretome P | Sequence coverage |
|------------|----------------------|-----------------------------------------------------------------------------------|-------------|-------------------|
| <b>SAT</b> | P02749 APOH_HUMAN    | Beta-2-glycoprotein 1                                                             | SP          | 5,8               |
|            | P20908 CO5A1_HUMAN   | Collagen alpha-1(V) chain                                                         | SP          | 1,0               |
|            | P09871 C1S_HUMAN     | Complement C1s subcomponent                                                       | SP          | 6,0               |
|            | P08174 DAF_HUMAN     | Complement decay-accelerating factor                                              | SP          | 6,3               |
|            | Q16610 ECM1_HUMAN    | Extracellular matrix protein 1                                                    | SP          | 11,3              |
|            | P02671 FIBA_HUMAN    | Fibrinogen alpha chain                                                            | SP          | 13,5              |
|            | Q92820 GGH_HUMAN     | Gamma-glutamyl hydrolase *                                                        | SP          | 4,4               |
|            | P35052 GPC1_HUMAN    | Glypican-1                                                                        | SP          | 3,4               |
|            | P00738 HPT_HUMAN     | Haptoglobin                                                                       | SP          | 4,2               |
|            | P04196 HRG_HUMAN     | Histidine-rich glycoprotein                                                       | SP          | 1,7               |
|            | P01860 IGHG3_HUMAN   | Ig gamma-3 chain C region                                                         | 0,544       | 15,1              |
|            | P01861 IGHG4_HUMAN   | Ig gamma-4 chain C region                                                         | 0,609       | 4,3               |
|            | P00338-2 LDHA_HUMAN  | Isoform 2 of L-lactate dehydrogenase A chain                                      | 0,549       | 6,3               |
|            | P56181-2 NDUV3_HUMAN | Isoform 2 of NADH dehydrogenase [ubiquinone] flavoprotein 3, mitochondrial        | 0,815       | 1,0               |
|            | P60174-2 TPIS_HUMAN  | Isoform 2 of Triosephosphate isomerase                                            | 0,51        | 11,2              |
|            | Q15063-4 POSTN_HUMAN | Isoform 4 of Periostin                                                            | SP          | 13,1              |
|            | P05164-3 PERM_HUMAN  | Isoform A of Myeloperoxidase                                                      | SP          | 4,1               |
|            | Q13822-2 ENPP2_HUMAN | Isoform Alpha of Ectonucleotide pyrophosphatase/phosphodiesterase family member 2 | SP          | 9,9               |
|            | P02751-7 FINC_HUMAN  | Isoform Fibronectin containing extra ED-B domain of Fibronectin                   | SP          | 10,5              |
|            | O14786 NRP1_HUMAN    | Neuropilin-1                                                                      | SP          | 1,7               |
|            | P59666 DEF3_HUMAN    | Neutrophil defensin 3                                                             | SP          | 19,2              |

|        |             |                 |       |     |
|--------|-------------|-----------------|-------|-----|
| P02760 | AMBP_HUMAN  | Protein AMBP    | SP    | 2,3 |
| Q9NS98 | SEM3G_HUMAN | Semaphorin-3G   | SP    | 3,1 |
| Q9BQG1 | SYT3_HUMAN  | Synaptotagmin-3 | 0,618 | 1,9 |
| Q01995 | TAGL_HUMAN  | Transgelin      | 0,56  | 9,5 |

# Supplementary material to Figure 4

## Complement C3 western blot

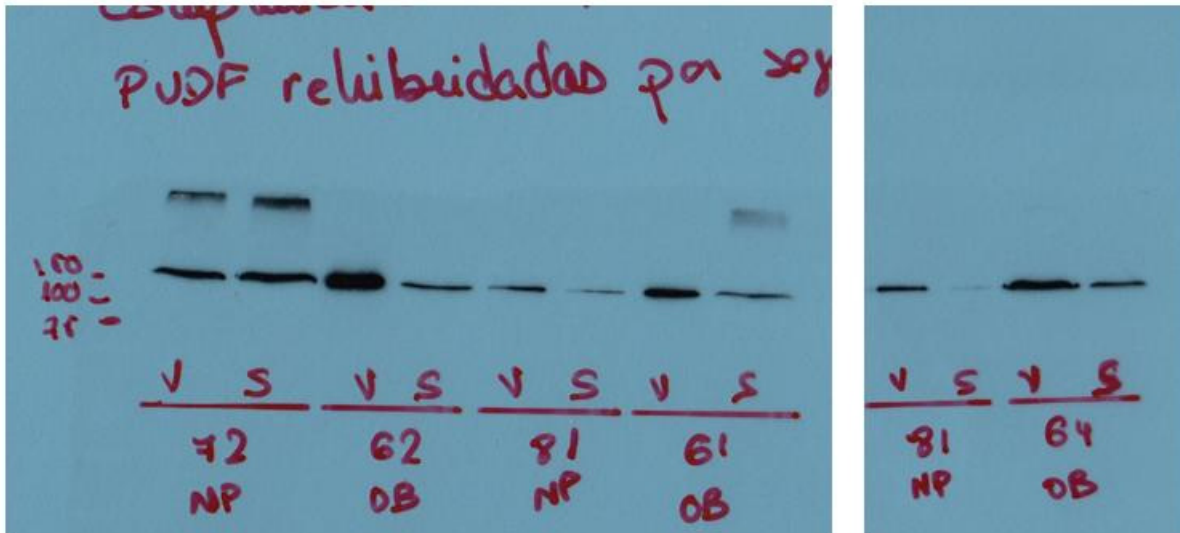

Whole membrane images of Complement C3 western blot from Figure 4A are shown.

Supplementary material to Figure 4  
TIMP-1 western blot

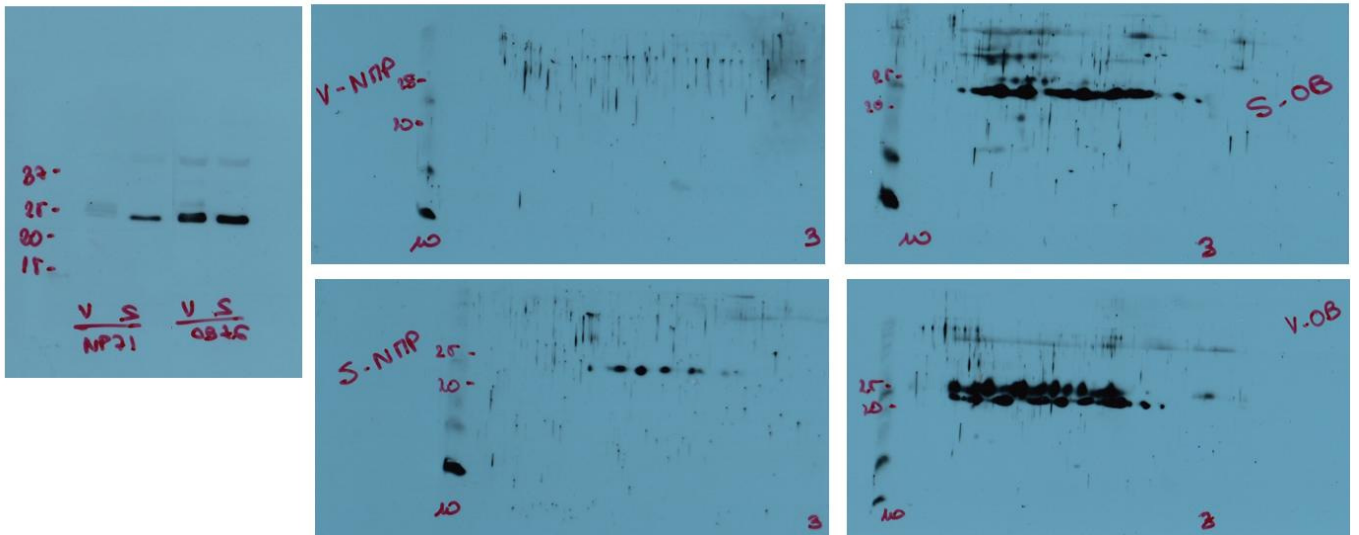

Whole membrane images of 1-D and 2-D TIMP-1 western blots from Figure 4B are shown.
